# Supplementary material for: Survival of Escherichia coli O157:H7 during Moderate Temperature Dehydration of Plant-Based Foods
Source: MDPI journal article supplement (doi:10.3390/foods10092162), 2021-09-13
Supplement: s1 [file s1]

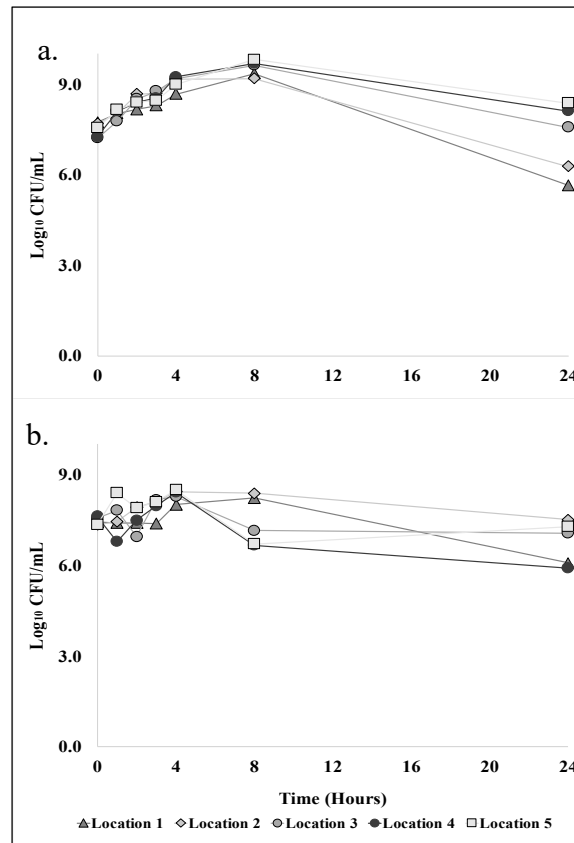

**Figure S1:** Survival plots for *E. coli* O157:H7 cocktail (average Log CFU/g) in tofu (a) and apples (b) when treated at 60°C for up to 24 hours during inoculated pack studies at two different tray locations.
